# Supplementary material
Source: publisher figshare collection journal article supplement (https://sage.figshare.com/ndownloader/files/20098475)

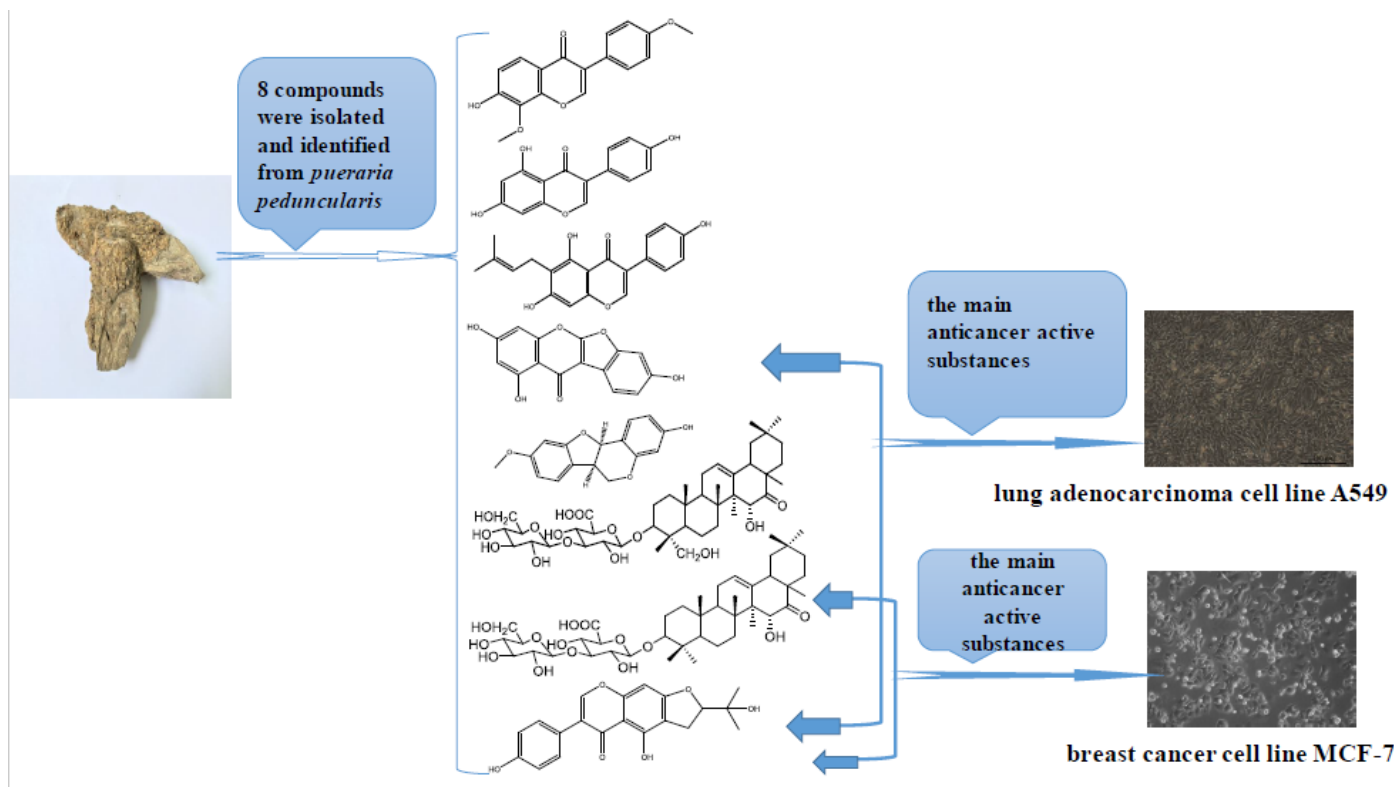

Online Supplementary

Supplement: Supplementary file 1 [file 20098475]
